# Supplementary material
Source: PubMed Central journal article supplement (PMC6075478)
Supplement: dyx222_ije-2016-12-1481.pdf [file dyx222_ije-2016-12-1481.pdf]

Appendix Table A1. OLS regression estimates of famine effects on later-life cognitive decline during 2011-2013 after multiple imputations for missing data.

| Cognitive change during<br>2011-2013            | TICS                      |                | Episodic memory           |                | Draw pentagons            |                | General cognition          |                |
|-------------------------------------------------|---------------------------|----------------|---------------------------|----------------|---------------------------|----------------|----------------------------|----------------|
|                                                 | Coef.                     | <i>p-value</i> | Coef.                     | <i>p-value</i> | Coef.                     | <i>p-value</i> | Coef.                      | <i>p-value</i> |
| Model 1 (reference cohort: 1963) <sup>a</sup>   |                           |                |                           |                |                           |                |                            |                |
| $\beta_{1958}(CSSI \times 1958 \text{ cohort})$ | 0.005<br>(-0.023, 0.033)  | 0.742          | 0.005<br>(-0.027, 0.037)  | 0.734          | 0.002<br>(-0.004, 0.008)  | 0.561          | 0.012<br>(-0.028, 0.052)   | 0.540          |
| $\beta_{1959}(CSSI \times 1959 \text{ cohort})$ | -0.027<br>(-0.059, 0.005) | 0.101          | -0.022<br>(-0.051, 0.007) | 0.128          | -0.005<br>(-0.013, 0.002) | 0.181          | -0.042<br>(-0.080, -0.003) | 0.033          |
| $\beta_{1960}(CSSI \times 1960 \text{ cohort})$ | 0.000<br>(-0.025, 0.024)  | 0.979          | 0.010<br>(-0.015, 0.035)  | 0.421          | -0.002<br>(-0.007, 0.008) | 0.548          | 0.003<br>(-0.035, 0.041)   | 0.875          |
| $\beta_{1961}(CSSI \times 1961 \text{ cohort})$ | 0.013<br>(-0.015, 0.041)  | 0.361          | -0.007<br>(-0.032, 0.018) | 0.559          | 0.000<br>(-0.007, 0.008)  | 0.962          | 0.005<br>(-0.040, 0.050)   | 0.819          |
| $\beta_{1962}(CSSI \times 1962 \text{ cohort})$ | -0.013<br>(-0.035, 0.009) | 0.244          | 0.007<br>(-0.020, 0.035)  | 0.560          | -0.001<br>(-0.007, 0.005) | 0.645          | -0.008<br>(-0.042, 0.025)  | 0.616          |
| Model 2 (reference cohort: 1963) <sup>b</sup>   |                           |                |                           |                |                           |                |                            |                |
| $\beta_{1958}(CSSI \times 1958 \text{ cohort})$ | 0.008<br>(-0.024, 0.039)  | 0.619          | 0.004<br>(-0.024, 0.033)  | 0.737          | 0.002<br>(-0.005, 0.009)  | 0.499          | 0.016<br>(-0.025, 0.056)   | 0.441          |
| $\beta_{1959}(CSSI \times 1959 \text{ cohort})$ | -0.024<br>(-0.059, 0.011) | 0.176          | -0.022<br>(-0.046, 0.001) | 0.062          | -0.005<br>(-0.013, 0.004) | 0.255          | -0.042<br>(-0.084, 0.000)  | 0.048          |
| $\beta_{1960}(CSSI \times 1960 \text{ cohort})$ | 0.002<br>(-0.024, 0.028)  | 0.872          | 0.011<br>(-0.015, 0.037)  | 0.395          | -0.001<br>(-0.007, 0.005) | 0.650          | 0.005<br>(-0.038, 0.048)   | 0.802          |
| $\beta_{1961}(CSSI \times 1961 \text{ cohort})$ | 0.012<br>(-0.016, 0.040)  | 0.392          | -0.010<br>(-0.042, 0.021) | 0.474          | 0.000<br>(-0.008, 0.007)  | 0.953          | 0.005<br>(-0.036, 0.045)   | 0.822          |
| $\beta_{1962}(CSSI \times 1962 \text{ cohort})$ | -0.013<br>(-0.035, 0.010) | 0.277          | 0.002<br>(-0.020, 0.024)  | 0.828          | -0.001<br>(-0.007, 0.005) | 0.647          | -0.008<br>(-0.041, 0.026)  | 0.641          |

Notes:

Coef. denotes coefficient.

CSSI denotes mean-centered cohort size shrinkage index at the prefecture level.

Numbers in the parentheses are 95% confidence intervals.

<sup>a</sup>Adjusted for cohort, CSSI, gender, marital status, provincial fixed effects.

<sup>b</sup>Model 1 + additionally adjusted for education.

Appendix Table A2. OLS regression estimates of famine effects on later-life cognition in 2011: Urban sample.

| Cognition in 2011                               | TICS             |                 | Episodic memory |                 | Draw pentagons  |                 | General cognition |                 |
|-------------------------------------------------|------------------|-----------------|-----------------|-----------------|-----------------|-----------------|-------------------|-----------------|
|                                                 | Coef.            | <i>p</i> -value | Coef.           | <i>p</i> -value | Coef.           | <i>p</i> -value | Coef.             | <i>p</i> -value |
| Model 1 (reference cohort: 1963) <sup>a</sup>   |                  |                 |                 |                 |                 |                 |                   |                 |
| $\beta_{1958}(CSSI \times 1958 \text{ cohort})$ | -0.029           | 0.241           | 0.004           | 0.846           | -0.002          | 0.536           | -0.028            | 0.343           |
|                                                 | (-0.078, 0.020)  |                 | (-0.035, 0.043) |                 | (-0.008, 0.004) |                 | (-0.085, 0.030)   |                 |
| $\beta_{1959}(CSSI \times 1959 \text{ cohort})$ | -0.010           | 0.628           | -0.031          | 0.217           | -0.005          | 0.087           | -0.035            | 0.296           |
|                                                 | (-0.049, 0.030)  |                 | (-0.080, 0.018) |                 | (-0.010, 0.001) |                 | (-0.103, 0.032)   |                 |
| $\beta_{1960}(CSSI \times 1960 \text{ cohort})$ | -0.020           | 0.432           | 0.028           | 0.145           | 0.000           | 0.930           | 0.013             | 0.676           |
|                                                 | (-0.071, 0.031)  |                 | (-0.010, 0.067) |                 | (-0.007, 0.007) |                 | (-0.050, 0.077)   |                 |
| $\beta_{1961}(CSSI \times 1961 \text{ cohort})$ | -0.020           | 0.450           | -0.002          | 0.916           | 0.000           | 0.960           | -0.013            | 0.659           |
|                                                 | (-0.072, 0.032)  |                 | (-0.046, 0.041) |                 | (-0.005, 0.005) |                 | (-0.070, 0.045)   |                 |
| $\beta_{1962}(CSSI \times 1962 \text{ cohort})$ | -0.058           | 0.045           | -0.023          | 0.182           | 0.000           | 0.930           | -0.057            | 0.047           |
|                                                 | (-0.114, -0.001) |                 | (-0.056, 0.011) |                 | (-0.006, 0.007) |                 | (-0.113, -0.001)  |                 |
| Model 2 (reference cohort: 1963) <sup>b</sup>   |                  |                 |                 |                 |                 |                 |                   |                 |
| $\beta_{1958}(CSSI \times 1958 \text{ cohort})$ | -0.011           | 0.590           | 0.007           | 0.703           | 0.001           | 0.761           | -0.006            | 0.800           |
|                                                 | (-0.054, 0.031)  |                 | (-0.030, 0.045) |                 | (-0.005, 0.006) |                 | (-0.057, 0.045)   |                 |
| $\beta_{1959}(CSSI \times 1959 \text{ cohort})$ | -0.003           | 0.890           | -0.029          | 0.240           | -0.004          | 0.120           | -0.030            | 0.368           |
|                                                 | (-0.040, 0.034)  |                 | (-0.077, 0.020) |                 | (-0.009, 0.001) |                 | (-0.095, 0.036)   |                 |
| $\beta_{1960}(CSSI \times 1960 \text{ cohort})$ | -0.027           | 0.266           | 0.030           | 0.127           | -0.002          | 0.576           | 0.001             | 0.966           |
|                                                 | (-0.074, 0.021)  |                 | (-0.009, 0.069) |                 | (-0.009, 0.005) |                 | (-0.060, 0.063)   |                 |
| $\beta_{1961}(CSSI \times 1961 \text{ cohort})$ | -0.020           | 0.457           | -0.001          | 0.951           | -0.001          | 0.723           | -0.017            | 0.570           |
|                                                 | (-0.073, 0.033)  |                 | (-0.044, 0.041) |                 | (-0.006, 0.004) |                 | (-0.075, 0.042)   |                 |
| $\beta_{1962}(CSSI \times 1962 \text{ cohort})$ | -0.055           | 0.036           | -0.021          | 0.221           | 0.000           | 0.953           | -0.054            | 0.043           |
|                                                 | (-0.106, -0.004) |                 | (-0.054, 0.013) |                 | (-0.006, 0.006) |                 | (-0.107, -0.002)  |                 |

Notes:

Coef. denotes coefficient.

CSSI denotes mean-centered cohort size shrinkage index at the prefecture level.

Numbers in the parentheses are 95% confidence intervals.

<sup>a</sup>Adjusted for cohort, CSSI, gender, marital status, provincial fixed effects.

<sup>b</sup>Model 1 + additionally adjusted for education.

Appendix Table A3. OLS regression estimates of famine effects on later-life cognitive decline during 2011-2013: Urban sample.

| Cognitive change during<br>2011-2013            | TICS            |                | Episodic memory  |                | Draw pentagons  |                | General cognition |                |
|-------------------------------------------------|-----------------|----------------|------------------|----------------|-----------------|----------------|-------------------|----------------|
|                                                 | Coef.           | <i>p-value</i> | Coef.            | <i>p-value</i> | Coef.           | <i>p-value</i> | Coef.             | <i>p-value</i> |
| Model 1 (reference cohort: 1963) <sup>a</sup>   |                 |                |                  |                |                 |                |                   |                |
| $\beta_{1958}(CSSI \times 1958 \text{ cohort})$ | 0.022           | 0.504          | -0.032           | 0.237          | 0.003           | 0.533          | -0.018            | 0.642          |
|                                                 | (-0.044, 0.089) |                | (-0.087, 0.022)  |                | (-0.006, 0.012) |                | (-0.095, 0.059)   |                |
| $\beta_{1959}(CSSI \times 1959 \text{ cohort})$ | 0.015           | 0.596          | 0.012            | 0.642          | -0.005          | 0.432          | 0.012             | 0.716          |
|                                                 | (-0.042, 0.072) |                | (-0.038, 0.062)  |                | (-0.016, 0.007) |                | (-0.053, 0.076)   |                |
| $\beta_{1960}(CSSI \times 1960 \text{ cohort})$ | 0.035           | 0.343          | -0.096           | 0.000          | 0.003           | 0.527          | -0.057            | 0.288          |
|                                                 | (-0.038, 0.108) |                | (-0.144, 0.048)  |                | (-0.007, 0.014) |                | (-0.162, 0.049)   |                |
| $\beta_{1961}(CSSI \times 1961 \text{ cohort})$ | 0.004           | 0.926          | -0.050           | 0.070          | 0.004           | 0.731          | -0.051            | 0.269          |
|                                                 | (-0.082, 0.090) |                | (-0.104, 0.004)  |                | (-0.020, 0.028) |                | (-0.143, 0.041)   |                |
| $\beta_{1962}(CSSI \times 1962 \text{ cohort})$ | 0.018           | 0.614          | -0.033           | 0.153          | -0.007          | 0.223          | -0.028            | 0.582          |
|                                                 | (-0.054, 0.090) |                | (-0.078, 0.012)  |                | (-0.018, 0.004) |                | (-0.131, 0.074)   |                |
| Model 2 (reference cohort: 1963) <sup>b</sup>   |                 |                |                  |                |                 |                |                   |                |
| $\beta_{1958}(CSSI \times 1958 \text{ cohort})$ | 0.023           | 0.473          | -0.019           | 0.438          | 0.004           | 0.421          | -0.002            | 0.952          |
|                                                 | (-0.041, 0.087) |                | (-0.069, 0.030)  |                | (-0.005, 0.013) |                | (-0.074, 0.070)   |                |
| $\beta_{1959}(CSSI \times 1959 \text{ cohort})$ | 0.012           | 0.663          | 0.013            | 0.633          | -0.004          | 0.555          | 0.013             | 0.702          |
|                                                 | (-0.044, 0.068) |                | (-0.041, 0.066)  |                | (-0.016, 0.009) |                | (-0.053, 0.078)   |                |
| $\beta_{1960}(CSSI \times 1960 \text{ cohort})$ | 0.028           | 0.423          | -0.098           | 0.000          | 0.005           | 0.440          | -0.062            | 0.255          |
|                                                 | (-0.042, 0.099) |                | (-0.148, -0.049) |                | (-0.007, 0.017) |                | (-0.169, 0.046)   |                |
| $\beta_{1961}(CSSI \times 1961 \text{ cohort})$ | 0.006           | 0.898          | -0.058           | 0.044          | 0.004           | 0.763          | -0.060            | 0.203          |
|                                                 | (-0.083, 0.094) |                | (-0.115, -0.002) |                | (-0.020, 0.027) |                | (-0.152, 0.033)   |                |
| $\beta_{1962}(CSSI \times 1962 \text{ cohort})$ | 0.015           | 0.677          | -0.036           | 0.103          | -0.006          | 0.283          | -0.033            | 0.532          |
|                                                 | (-0.056, 0.085) |                | (-0.080, 0.008)  |                | (-0.018, 0.005) |                | (-0.136, 0.071)   |                |

Notes:

Coef. denotes coefficient.

CSSI denotes mean-centered cohort size shrinkage index at the prefecture level.

Numbers in the parentheses are 95% confidence intervals.

<sup>a</sup>Adjusted for cohort, CSSI, gender, marital status, provincial fixed effects.

<sup>b</sup>Model 1 + additionally adjusted for education.
